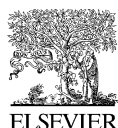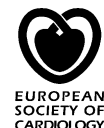

Clinical research

# Markers of inflammation in patients with coronary artery disease are also associated with glycosylated haemoglobin A<sub>1c</sub> within the normal range

Carl Gunnar Gustavsson<sup>a,\*</sup>, Carl-David Agardh<sup>b</sup>

<sup>a</sup> Department of Cardiology, University Hospital MAS, SE-20502 Malmö, Sweden

<sup>b</sup> Department of Endocrinology, University Hospital MAS, SE-20502 Malmö, Sweden

Received 21 November 2003; revised 23 July 2004; accepted 3 September 2004

Available online 11 November 2004

## KEYWORDS

Inflammation;  
HbA<sub>1c</sub>;  
Atherosclerosis;  
Diabetes

**Aims** Diabetes is a risk factor for atherosclerosis and low-degree inflammation may play a central role in both diseases. Glycosylated haemoglobin A<sub>1c</sub> (HbA<sub>1c</sub>) is an established measure of long-term glycaemic control but data on its correlation with markers of inflammation are limited, especially in patients with atherosclerotic manifestations. The aim of the present study was thus to investigate the associations between HbA<sub>1c</sub> and a panel of inflammation-sensitive parameters in patients with and without diabetes.

**Methods and results** This single centre cross-sectional study comprised 314 consecutive subjects who underwent coronary angioplasty for stable coronary artery disease. Sixty-six patients had diabetes mellitus. Haemoglobin A<sub>1c</sub> and markers of inflammation, i.e., plasma levels of CRP, fibrinogen, and albumin, erythrocyte sedimentation rate and white blood cell count were measured. All inflammation markers were altered in a more inflammatory direction in diabetic patients. Furthermore, when non-diabetic patients with HbA<sub>1c</sub> levels within the normal range were studied separately, all inflammation-sensitive parameters except albumin correlated significantly with HbA<sub>1c</sub>.

**Conclusion** In subjects with known coronary atherosclerosis, low-degree inflammatory activity is not only increased in diabetic patients, but also increased with increasing HbA<sub>1c</sub> in non-diabetic individuals with HbA<sub>1c</sub> within the normal range, i.e., at a pre-diabetic level of glucose metabolism derangement.

© 2004 The European Society of Cardiology. Published by Elsevier Ltd. All rights reserved.

## Introduction

Inflammation has been suggested to play a central role in the development of atherosclerosis.<sup>1,2</sup> Diabetes is not only a well known risk factor for atherosclerosis but is also associated with increased levels of sensitive markers

of subclinical systemic inflammation.<sup>1–4</sup> However, less data are available about the relationship between glycosylated haemoglobin A<sub>1c</sub> (HbA<sub>1c</sub>), a measure of long term glycaemic control, and markers of inflammation. Wu et al.<sup>5</sup> studied 5342 adult individuals who reported not having diabetes. In that study, elevated levels of C-reactive protein (CRP) were associated with higher HbA<sub>1c</sub> and insulin levels, and also with increased fasting glucose levels in women. Another study by Festa et al.<sup>6</sup> found a

\* Corresponding author. Tel.: +46 40 33 28 63; fax: +46 40 33 62 09.  
E-mail address: cg@gustavsson.se (C.G. Gustavsson).

stronger association of CRP with post-challenge glycaemia than with fasting glucose but the study did not include HbA<sub>1c</sub>. Associations were also found between HbA<sub>1c</sub> and fibrinogen levels in patients with non-insulin-dependent diabetes<sup>7,8</sup> and between HbA<sub>1c</sub> and white blood cell count.<sup>9</sup> In addition, previous studies suggested that low-grade systemic inflammation is involved in the pathogenesis of type 2 diabetes and that a subclinical inflammatory reaction precedes the onset of type 2 diabetes.<sup>10–13</sup>

The purpose of this study was therefore to investigate the associations between HbA<sub>1c</sub> and a panel of inflammation-sensitive parameters in patients with angiographically documented coronary artery disease with and without diabetes.

Methods

Patients

Patients considered for inclusion in the study were all 722 patients undergoing percutaneous transluminal coronary angioplasty (PTCA) for stable coronary artery disease at the University Hospital MAS, Malmö, Sweden from the start of the study 1st January 2000 until we had to close the study 3 1/2 years later for financial and practical reasons. To avoid a possi-

ble influence from inflammatory reactions due to previously performed coronary interventions, we excluded 398 patients with a history of PTCA or coronary artery bypass grafting surgery (CABG). Finally, additional ten patients were excluded due to missing HbA<sub>1c</sub> data. The study population then comprised 314 consecutive patients, out of whom 66 had diabetes. The diabetes diagnosis was based on previously known diabetes in 46 patients, and on HbA<sub>1c</sub> levels >5.3% in an additional 20 patients. The remaining 248 patients with HbA<sub>1c</sub> levels ≤5.3% were considered as non-diabetic.<sup>14</sup> The proportions of patients with normal, impaired and diabetic fasting glucose levels<sup>15</sup> in relation to case history and HbA<sub>1c</sub> is shown in Table 1. Patient characteristics are given in Table 2. Three patients had type 1 diabetes and the remaining 43 patients with previously diagnosed diabetes had type 2 diabetes (21 treated with insulin; eight in combination with oral antidiabetics, 16 with oral antidiabetics and the remaining six patients with diet only).

Blood sampling and analytical techniques

Venous blood samples were drawn on admission and were immediately sent to an accredited laboratory (Department of Clinical Chemistry at the University Hospital MAS, Malmö, Sweden) for analysis according to the clinical routine. High sensitive CRP was determined with a particle immunoassay rate methodology (Beckman Immage), albumin by means of a bichromatic methodology using brom cresol purple reagent (Beckman Synchron LX20), fibrinogen with a turbidimetric clotting rate method using

Table 1 Fasting glucose levels in relation to case history and HbA<sub>1c</sub> levels in 271 patients

|                                                   | Without previously diagnosed diabetes |                          | Known diabetes |
|---------------------------------------------------|---------------------------------------|--------------------------|----------------|
|                                                   | HbA <sub>1c</sub> ≤ 5.3%              | HbA <sub>1c</sub> > 5.3% |                |
| Normal fasting glucose level <5.6 mmol/L (n)      | 138                                   | 5                        | 3              |
| Impaired fasting glucose level 5.6–6.9 mmol/L (n) | 71                                    | 6                        | 7              |
| Diabetic fasting glucose level ≥ 7.0 mmol/L (n)   | 4                                     | 6                        | 31             |

Table 2 Demographic characteristics of patients with and without diabetes undergoing percutaneous transluminal coronary artery angioplasty

|                                            | Diabetic patients (N = 66) | Non-diabetic patients (N = 248) | p value |
|--------------------------------------------|----------------------------|---------------------------------|---------|
| Age (years)                                | 61 (53, 71)                | 61 (53, 68)                     | 0.9683  |
| Male/female (n)                            | 46/20                      | 190/58                          | 0.2478  |
| Body mass index (kg/m <sup>2</sup> )       | 27.8 (25.4, 30.9)          | 26.6 (24.3, 28.4)               | 0.0007  |
| Current smoking (yes/no; n)                | 14/52                      | 55/193                          | 0.8663  |
| Coronary angiography (n)                   |                            |                                 |         |
| 3-vessel disease                           | 15                         | 49                              | 0.2221  |
| 2-vessel disease                           | 30                         | 91                              |         |
| 1-vessel disease                           | 21                         | 108                             |         |
| Systolic blood pressure (mmHg)             | 140 (120, 156)             | 140 (125, 150)                  | 0.7815  |
| Diastolic blood pressure (mmHg)            | 78 (70, 82)                | 80 (70, 85)                     | 0.7811  |
| Anti-hypertensive drug therapy (yes/no; n) | 37/29                      | 87/161                          | 0.0019  |
| Acetylsalicylic acid therapy (yes/no; n)   | 50/16                      | 233/15                          | <0.0001 |
| Statin therapy (yes/no; n)                 | 53/13                      | 184/64                          | 0.3052  |
| Total cholesterol (mmol/L)                 | 4.300 (3.590, 5.335)       | 4.515 (3.945, 5.213)            | 0.3371  |
| LDL-cholesterol (mmol/L)                   | 2.600 (1.900, 3.300)       | 2.600 (2.200, 3.200)            | 0.2860  |
| HDL-cholesterol (mmol/L)                   | 1.090 (0.960, 1.220)       | 1.125 (0.930, 1.380)            | 0.2595  |
| Triglyceride (mmol/L)                      | 1.500 (0.975, 1.960)       | 1.300 (0.900, 1.853)            | 0.2595  |

Data are given as median (25th percentile, 75th percentile) and number of patients.

**Table 3** HbA<sub>1c</sub> and markers of inflammation in diabetic and non-diabetic patients

|                                              | Non-diabetic patients with HbA <sub>1c</sub> ≤ 5.3% (N = 248) | Diabetic patients – known diabetes or HbA <sub>1c</sub> > 5.3% (N = 66) | p value for the comparison to non-diabetic patients | Patients with previously known diabetes separately (N = 46) | p value for the comparison to non-diabetic patients |
|----------------------------------------------|---------------------------------------------------------------|-------------------------------------------------------------------------|-----------------------------------------------------|-------------------------------------------------------------|-----------------------------------------------------|
| HbA <sub>1c</sub> (%)                        | 4.6 (4.4, 4.9)                                                | 6.1 (5.6, 7.1)                                                          | <0.0001                                             | 6.8 (6.0, 7.6)                                              | <0.0001                                             |
| P-C-reactive protein (mg/L)                  | 2.1 (0.9, 4.6) (N = 234)                                      | 4.4 (2.3, 7.1) (N = 63)                                                 | <0.0001                                             | 4.7 (2.3, 7.2) (N = 44)                                     | 0.0001                                              |
| P-fibrinogen (g/L)                           | 3.3 (2.7, 3.8) (N = 236)                                      | 3.7 (2.8, 4.4) (N = 64)                                                 | 0.0495                                              | 3.6 (3.0, 4.4) (N = 45)                                     | 0.0663                                              |
| P-Albumin (g/L)                              | 39 (37, 40) (N = 239)                                         | 38 (36, 40) (N = 63)                                                    | 0.0206                                              | 38 (36, 40) (N = 44)                                        | 0.0311                                              |
| Erythrocyte sedimentation rate (mm/hour)     | 8 (4, 14) (N = 241)                                           | 10 (8, 22) (N = 63)                                                     | 0.0001                                              | 10 (8, 22) (N = 43)                                         | 0.0004                                              |
| White blood cell count (×10 <sup>9</sup> /L) | 7.0 (5.9, 8.4) (N = 248)                                      | 7.7 (6.6, 9.1) (N = 66)                                                 | 0.0101                                              | 7.6 (6.5, 8.9) (N = 46)                                     | 0.0331                                              |

Values are given as median (25th percentile, 75th percentile) together with number of patients.

thrombin as initiator (Behring BCS) and HbA<sub>1c</sub> with an HPLC-method (Bio-Rad Variant II). White blood cells were counted on a Coulter Gen S counter.

The detection limits and interassay co-efficients of variation (mean concentrations) of these methods were: CRP 0.3 mg/L and 6.7% (0.76 mg/L) and 4.3% (2.03 mg/L), for albumin 10 g/L and 1.5% (27.0 g/L) and 1.4% (48.5 g/L), and for fibrinogen 0.7 g/L and 3.6% (1.2 g/L) and 2.4% (4.8 g/L), respectively. The interassay co-efficients of variation (mean concentrations) for HbA<sub>1c</sub> are 2.4% (4.7%) and 1.8% (8.8%) and for white blood cell count 2.9% (3.41 times 10<sup>9</sup>/L) and 1.2% (19.9 times 10<sup>9</sup>/L).

The upper limit of normal for HbA<sub>1c</sub> was considered to be 5.3%.<sup>14,16</sup> This apparently rather low level is in accordance with the Swedish national standard. In a recent publication, HbA<sub>1c</sub> data from our hospital, which is representative of this standard,

were compared with the IFCC Reference Method.<sup>17</sup> Hospitals representative of the US and the Japanese national standards also participated in that study. All three national standards correlated well with the IFCC Reference Method ( $r^2 = 0.998–0.996$ ) but they all produced values at different levels above the reference method. HbA<sub>1c</sub> according to the Swedish standard was about 0.8% lower than HbA<sub>1c</sub> according to the US standard.

### Statistical analysis

The commercial program SPSS for Windows, Release 6.1 (SPSS Inc., Chicago, IL, USA) was used for the analyses. All tests were two-sided and p values <0.05 were considered statistically sig-

**Table 4** Spearman's rank correlation's (r) between HbA<sub>1c</sub>, age, body mass index and inflammation sensitive parameters in the total material

|                                | HbA <sub>1c</sub>                 | Age                               | Body mass index                   | P-C-reactive protein              | P-fibrinogen                      | P-albumin                         | Erythrocyte sedimentation rate   |
|--------------------------------|-----------------------------------|-----------------------------------|-----------------------------------|-----------------------------------|-----------------------------------|-----------------------------------|----------------------------------|
| Age                            | 0.1278<br>P = 0.024<br>(N = 314)  |                                   |                                   |                                   |                                   |                                   |                                  |
| Body mass index                | 0.1563<br>p = 0.006<br>(N = 314)  | −0.1349<br>p = 0.017<br>(N = 314) |                                   |                                   |                                   |                                   |                                  |
| P-C-reactive protein           | 0.2804<br>p < 0.001<br>(N = 297)  | 0.0250<br>p = 0.668<br>(N = 297)  | 0.1908<br>p = 0.001<br>(N = 297)  |                                   |                                   |                                   |                                  |
| P-fibrinogen                   | 0.1983<br>p = 0.001<br>(N = 300)  | 0.1043<br>p = 0.071<br>(N = 300)  | 0.1014<br>p = 0.080<br>(N = 300)  | 0.5805<br>p < 0.001<br>(N = 285)  |                                   |                                   |                                  |
| P-albumin                      | −0.2082<br>p < 0.001<br>(N = 302) | −0.3403<br>p < 0.001<br>(N = 302) | −0.0573<br>p = 0.321<br>(N = 302) | −0.2689<br>p < 0.001<br>(N = 288) | −0.1561<br>p = 0.008<br>(N = 288) |                                   |                                  |
| Erythrocyte sedimentation rate | 0.3146<br>p < 0.001<br>(N = 304)  | 0.2208<br>p < 0.001<br>(N = 304)  | 0.0517<br>p = 0.369<br>(N = 304)  | 0.4279<br>p < 0.001<br>(N = 290)  | 0.6144<br>p < 0.001<br>(N = 290)  | −0.2783<br>p < 0.001<br>(N = 293) |                                  |
| White blood cell count         | 0.1817<br>p = 0.001<br>(N = 314)  | −0.1612<br>p = 0.004<br>(N = 314) | 0.1220<br>p = 0.031<br>(N = 314)  | 0.3535<br>p < 0.001<br>(N = 297)  | 0.3530<br>p < 0.001<br>(N = 300)  | −0.0928<br>p = 0.108<br>(N = 302) | 0.1823<br>p = 0.001<br>(N = 304) |

**Table 5** Relationship between HbA<sub>1c</sub> and the inflammation sensitive study parameters

|                                | Diabetic patients          | Non-diabetic patients       |
|--------------------------------|----------------------------|-----------------------------|
| P-C-reactive peptide           | 0.1558<br><i>p</i> = 0.251 | 0.1621<br><i>p</i> = 0.014  |
| P-fibrinogen                   | 0.1174<br><i>p</i> = 0.384 | 0.1480<br><i>p</i> = 0.025  |
| P-albumin                      | 0.0740<br><i>p</i> = 0.588 | −0.0904<br><i>p</i> = 0.170 |
| Erythrocyte sedimentation rate | 0.0900<br><i>p</i> = 0.510 | 0.1853<br><i>p</i> = 0.004  |
| White blood cell count         | 0.0335<br><i>p</i> = 0.801 | 0.1632<br><i>p</i> = 0.011  |

Partial Spearman correlation co-efficients controlling for age, body mass index, smoking, anti-hypertensive treatment, treatment with acetylsalicylic acid and statins and number of stenotic coronary arteries.

nificant. Comparisons between groups were performed using the  $\chi^2$  test for categorical parameters and the Mann–Whitney *U* test for continuous parameters, as several study parameters (especially CRP and erythrocyte sedimentation rate) were not normally distributed. Spearman rank correlation and partial Spearman rank correlation tests were used for correlation analyses.

Results

The diabetic patients had a higher BMI than non-diabetic patients whereas the age distribution was rather similar in both groups and there were no differences regarding gender, smoking, extent of coronary artery disease or systolic and diastolic blood pressure (Table 2). Anti-hypertensive drug therapy was however more common in diabetic patients and acetylsalicylic acid therapy more common in non-diabetic individuals. There were no differences regarding statin therapy or lipid concentrations. All five inflammation-sensitive parameters were altered in an inflammatory direction in the diabetic patients (Table 3), but the fibrinogen concentration difference did not reach statistical significance when only the subgroup with previously diagnosed diabetes was compared to non-diabetic patients. When all patients were taken together we found highly significant correlations between HbA<sub>1c</sub> and all inflammation-sensitive parameters (Table 4). However, HbA<sub>1c</sub> also correlated with age and BMI which in turn both correlated with some of the inflammation-sensitive parameters. We thus performed a partial correlation analysis controlling for age and BMI. Additional potential confounders included in that analysis were smoking, number of stenotic coronary arteries and drug treatment with acetylsalicylic acid, statins and anti-hypertensive drugs. In the non-diabetic patients, this analysis again showed significant correlations between HbA<sub>1c</sub> and the inflammation-sensitive parameters CRP, fibrinogen, erythrocyte sedimentation rate and white blood cell count, which were all altered in an inflammatory direction (Table 5). In contrast, no correlations were found in the diabetic patients and the calculated correlation co-efficients were generally lower in this portion of the patient material. We also analysed the material for possible influence from drugs

for diabetes but could not find any such associations (data not shown).

Discussion

In this study of patients with well documented coronary artery disease, markers of inflammation were higher in patients with than without diabetes. This is in accordance with several previous studies<sup>1–4</sup> reporting increased inflammatory activity in diabetic patients. All inflammation-sensitive proteins were changed in an inflammatory direction, i.e., plasma levels of CRP and fibrinogen were increased and albumin reduced. Erythrocyte sedimentation rate, which largely depends on fibrinogen and albumin concentrations, was also increased in the diabetic patients and, similar to previous studies, white blood cell count was higher.<sup>3</sup>

Few studies have addressed the possible relationships between HbA<sub>1c</sub> and markers of inflammation, especially in patients with coronary artery disease. In our patients without diabetes, all markers of inflammation, except for plasma albumin were associated with HbA<sub>1c</sub>. There was also a non-significant tendency towards lower albumin concentrations with increasing HbA<sub>1c</sub>-levels, i.e., an alteration of this parameter also in an inflammatory direction. Our interpretation is that even a lower degree of derangement in glucose metabolism, but still with HbA<sub>1c</sub> within the normal range, is associated with increased inflammatory activity in these patients.

All our patients had documented coronary artery disease, which in several studies has been associated with increased concentrations of CRP<sup>1,2,18</sup> and fibrinogen,<sup>1,18</sup> lower plasma albumin concentrations,<sup>18</sup> and higher white blood cell counts.<sup>18</sup> Thus, in patients traditionally considered prone to have an increased inflammatory activity, a superimposition by a subclinical derangement in glucose metabolism might be of importance.

In the diabetic patients, no inflammatory marker correlated with HbA<sub>1c</sub>. This is in contrast to a study by Bruno et al., who reported a correlation between HbA<sub>1c</sub> and fibrinogen levels in 1574 patients with non-insulin-dependent diabetes.<sup>7</sup> Our material was possibly underpowered in this respect but the generally lower correlation co-efficients in the diabetic patients indicate

that probably also pathophysiological differences between diabetic and non-diabetic patients are involved. In a study by King et al.,<sup>19</sup> the likelihood of elevated CRP increased with increasing HbA<sub>1c</sub>, but only in patients with an HbA<sub>1c</sub> level above 9%. Thus, the different results could also be due to different levels of glycaemia, with a median HbA<sub>1c</sub> of 6.1% in the diabetic patients in our study. Also, in the study of King et al., a more crude method for measurement of CRP was used in contrast to the highly sensitive method used in this study.

Further support for the present hypothesis is the finding that insulin resistance (IRS) is associated with chronic subclinical inflammation, and both conditions are linked with increased risk for type 2 diabetes and atherosclerotic vascular disease. In 1008 non-diabetic individuals with no clinical coronary artery disease, Festa et al. found CRP, fibrinogen and white blood cell counts to be associated with several components of the IRS.<sup>20</sup> This is also supported by the results from the Women's Health Study, in which CRP was found to be independently associated with fasting hyperinsulinaemia in non-diabetic women.<sup>21</sup> In a previous study of apparently healthy middle-aged women, CRP and IL-6 were found to be determinants of risk for type 2 diabetes, especially CRP after adjustment for obesity. Similar results were found in women with a baseline HbA<sub>1c</sub> of 6% or less.<sup>10</sup> However, in that study, the four-year cardiovascular event rate was low. Thus, it seems that the relation between development of atherosclerosis and markers of inflammation, and the diabetic state may differ in its development.

For practical reasons, it was not possible to include oral glucose tolerance testing (OGTT) in the present study. However, a previous study by Norhammar et al.<sup>16</sup> showed good correlation between HbA<sub>1c</sub> at hospitalisation for myocardial infarction and OGTT three months later using the same core laboratory and the same upper limit of normal for HbA<sub>1c</sub> as our study.

In summary, the present study confirms that diabetic patients with macrovascular disease have increased levels of markers of inflammation, but also adds new information on a relationship between these markers and HbA<sub>1c</sub> within the normal range, indicating an early association between degree of glycaemia, inflammation and atherosclerosis prior to the development of diabetes.

## Acknowledgements

We are indebted to Dr. Johan Malm for detailed descriptions of the analytical methods and to Mr. Jan-Åke Nilsson for statistical advice.

## References

- Lind P, Hedblad B, Stavenow L et al. Influence of plasma fibrinogen levels on the incidence of myocardial infarction and death is modified by other inflammation-sensitive proteins: a long-term cohort study. *Atheroscler Thromb Vasc Biol* 2001;**21**:452–8.
- Koenig W, Sund M, Fröhlich M et al. C-reactive protein, a sensitive marker of inflammation, predicts future risk of coronary heart disease in initially healthy middle-aged men. *Circulation* 1999;**99**:237–42.
- Grau AJ, Buggle F, Becher H et al. The association of leukocyte count, fibrinogen and C-reactive protein with vascular risk factors and ischemic vascular diseases. *Thromb Res* 1996;**82**:245–55.
- Schalkwijk CG, Poland DC, van Dijk W et al. Plasma concentration of C-reactive protein is increased in type I diabetic patients without clinical macroangiopathy and correlates with markers of endothelial dysfunction: evidence for chronic inflammation. *Diabetologia* 1999;**42**:351–7.
- Wu T, Dorn JP, Donahue RP et al. Associations of serum C-reactive protein with fasting insulin, glucose, and glycosylated hemoglobin: the Third National Health and Nutrition Examination Survey, 1988–1994. *Am J Epidemiol* 2002;**155**:65–71.
- Festa A, D'Agostino Jr R, Tracy RP et al. C-reactive protein is more strongly related to post-glucose load glucose than to fasting glucose in non-diabetic subjects; the Insulin Resistance Atherosclerosis Study. *Diabet Med* 2002;**19**:939–43.
- Bruno G, Cavallo-Perin P, Barger G et al. Association of fibrinogen with glycemic control and albumin excretion rates in patients with non-insulin-dependent diabetes mellitus. *Ann Int Med* 1996;**125**:653–7.
- Kayaba K, Nago N, Miyamoto T et al. Glycated hemoglobin levels and their correlation with atherosclerotic risk factors in a Japanese population – the Jichi Medical School Cohort Study 1993–1995. *Jpn Circ J* 1998;**62**:261–6.
- Noguchi T, Tsujisaki M, Imai K et al. Relationship among risk factors of atherosclerosis, leukocyte count, and soluble intercellular adhesion molecule-1. *Int Med* 1998;**37**:123–6.
- Pradhan AD, Manson JE, Rifai N et al. C-reactive protein, interleukin 6, and risk of developing type 2 diabetes mellitus. *JAMA* 2001;**286**:327–34.
- Wolf M, Sandler L, Hsu K et al. First-trimester c-reactive protein and subsequent gestational diabetes. *Diabetes Care* 2003;**26**:819–24.
- Spranger J, Kroke A, Möhlig M et al. Inflammatory cytokines and the risk to develop type 2 diabetes. Results of the prospective population-based European prospective investigation into cancer and nutrition (EPIC) – Potsdam study. *Diabetes* 2003;**52**:812–7.
- Thorand B, Löwel H, Schneider A et al. C-reactive protein as a predictor for incident diabetes mellitus among middle-aged men. *Arch Int Med* 2003;**163**:93–9.
- Bäck SE. Towards common reference interval in clinical chemistry. *Clin Chem Lab Med* 1999;**37**:573–92.
- The expert committee on the diagnosis and classification of diabetes mellitus. Follow-up report on the diagnosis of diabetes mellitus. *Diabetes Care* 2003;**26**:3160–7.
- Norhammar A, Tenerz Å, Nilsson G et al. Glucose metabolism in patients with acute myocardial infarction and no previous diagnosis of diabetes mellitus: a prospective study. *Lancet* 2002;**359**:2140–4.
- Hoelzel W, Weykamp C, Jeppsson JO et al. IFCC reference system for measurement of hemoglobin A1c in human blood and the national standardization schemes in the United States, Japan, and Sweden: a method-comparison study. *Clin Chem* 2004;**50**:166–74.
- Danesh J, Collins R, Appleby P et al. Association of fibrinogen, C-reactive protein, albumin, or leukocyte count with coronary heart disease: meta-analyses of prospective studies. *JAMA* 1998;**279**:1477–82.
- King DE, Mainous III AG, Buchanan TA et al. C-reactive protein and glycemic control in adults with diabetes. *Diabetes Care* 2003;**26**:1535–9.
- Festa A, D'Agostino Jr R, Howard G et al. Chronic subclinical inflammation as part of the insulin resistance syndrome: the Insulin Resistance Atherosclerosis Study (IRAS). *Circulation* 2000;**102**:42–7.
- Pradhan AD, Cook NR, Buring JE et al. C-reactive protein is independently associated with fasting insulin in nondiabetic women. *Arterioscler Thromb Vasc Biol* 2003;**23**:650–5.
